# Supplementary material for: A Novel GBM Saliency Detection Model Using Multi-Channel MRI
Source: PLOS journal article supplement (doi:10.1371/journal.pone.0146388), 2016-01-11

# Supporting Information

A Novel GBM Saliency Detection Model using Multi-channel MRI

Subhashis Banerjee, Sushmita Mitra, B. Uma Shankar, Yoichi Hayashi

**S1 Fig. Additional visual examples of saliency maps by four state-of-the-art models and our proposed model**

Saliency maps for 2D MR slices on HG GBM

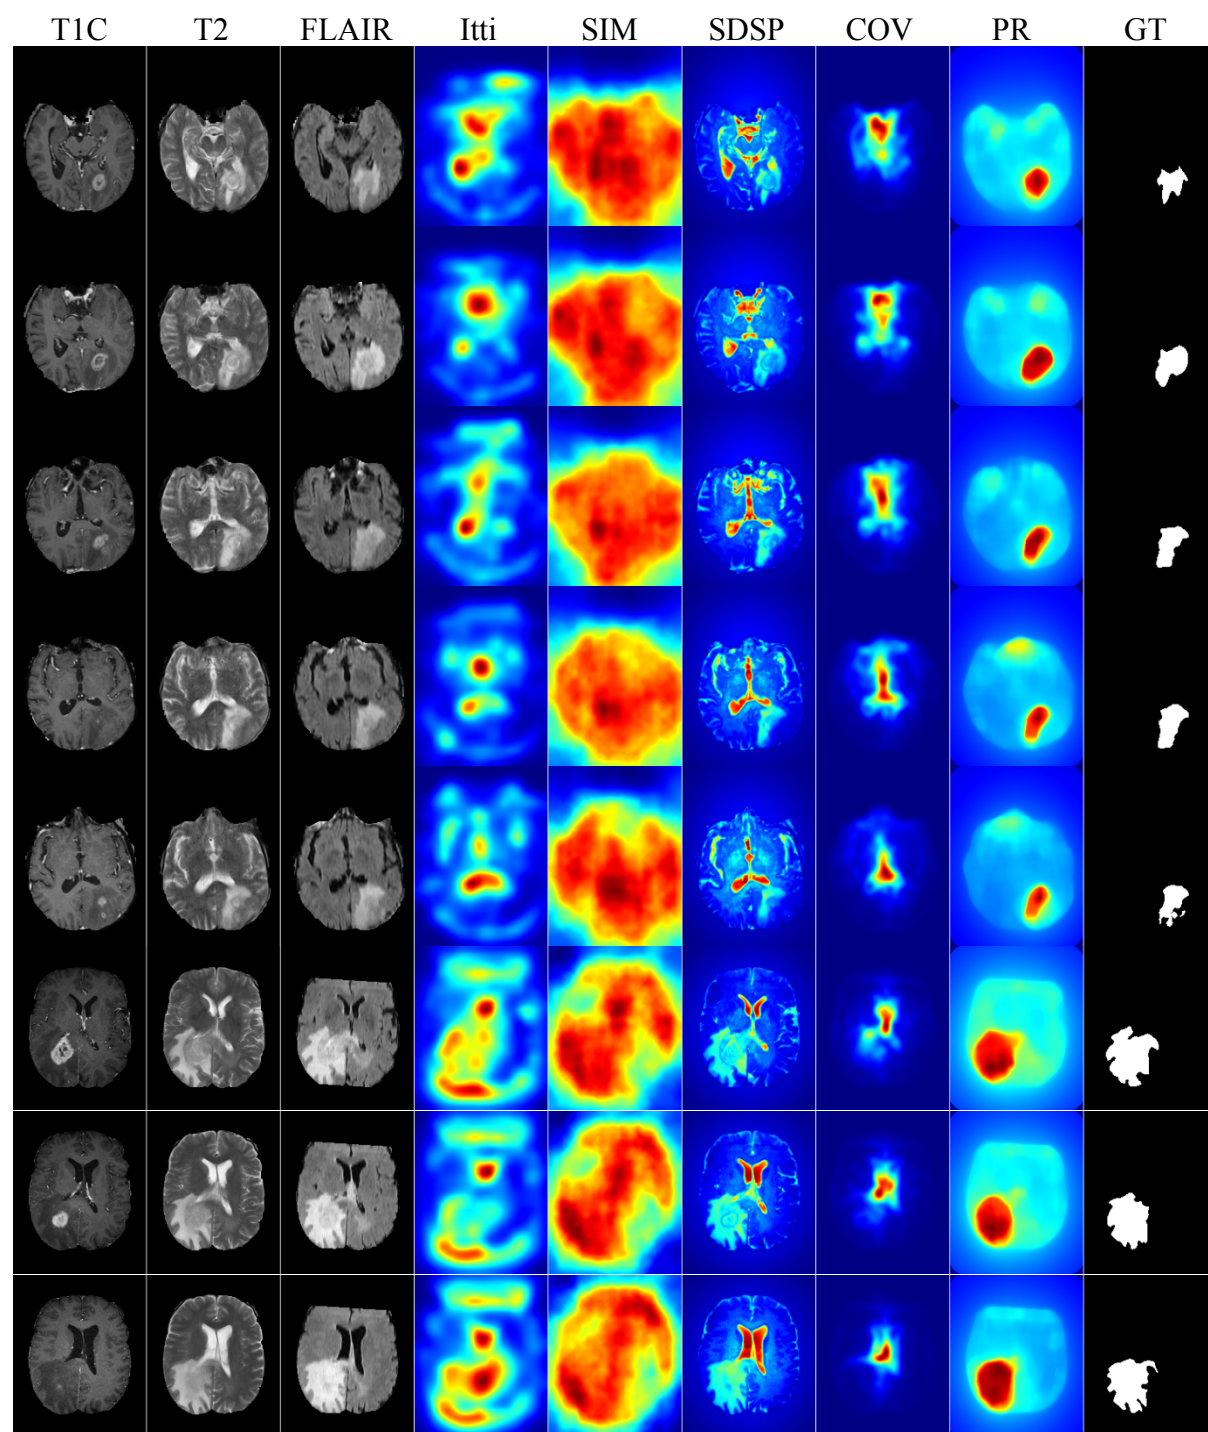

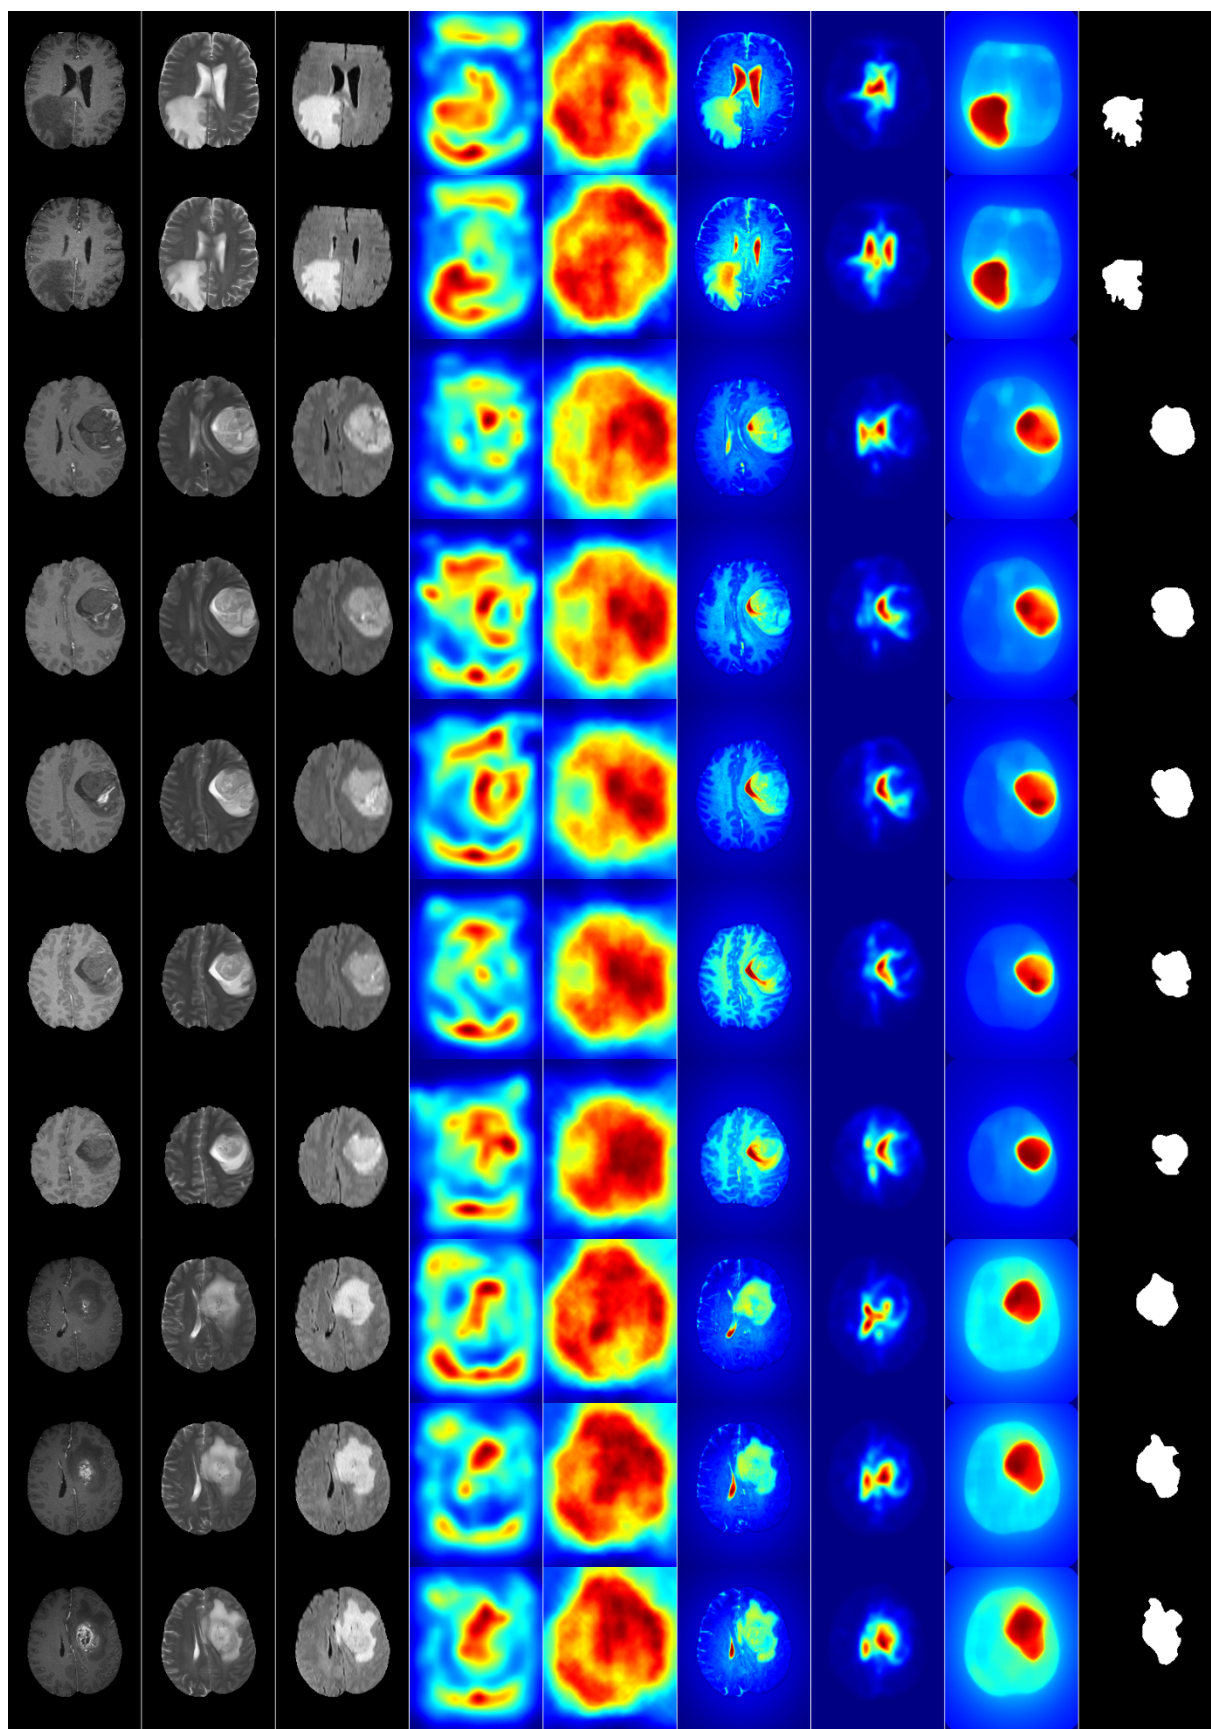

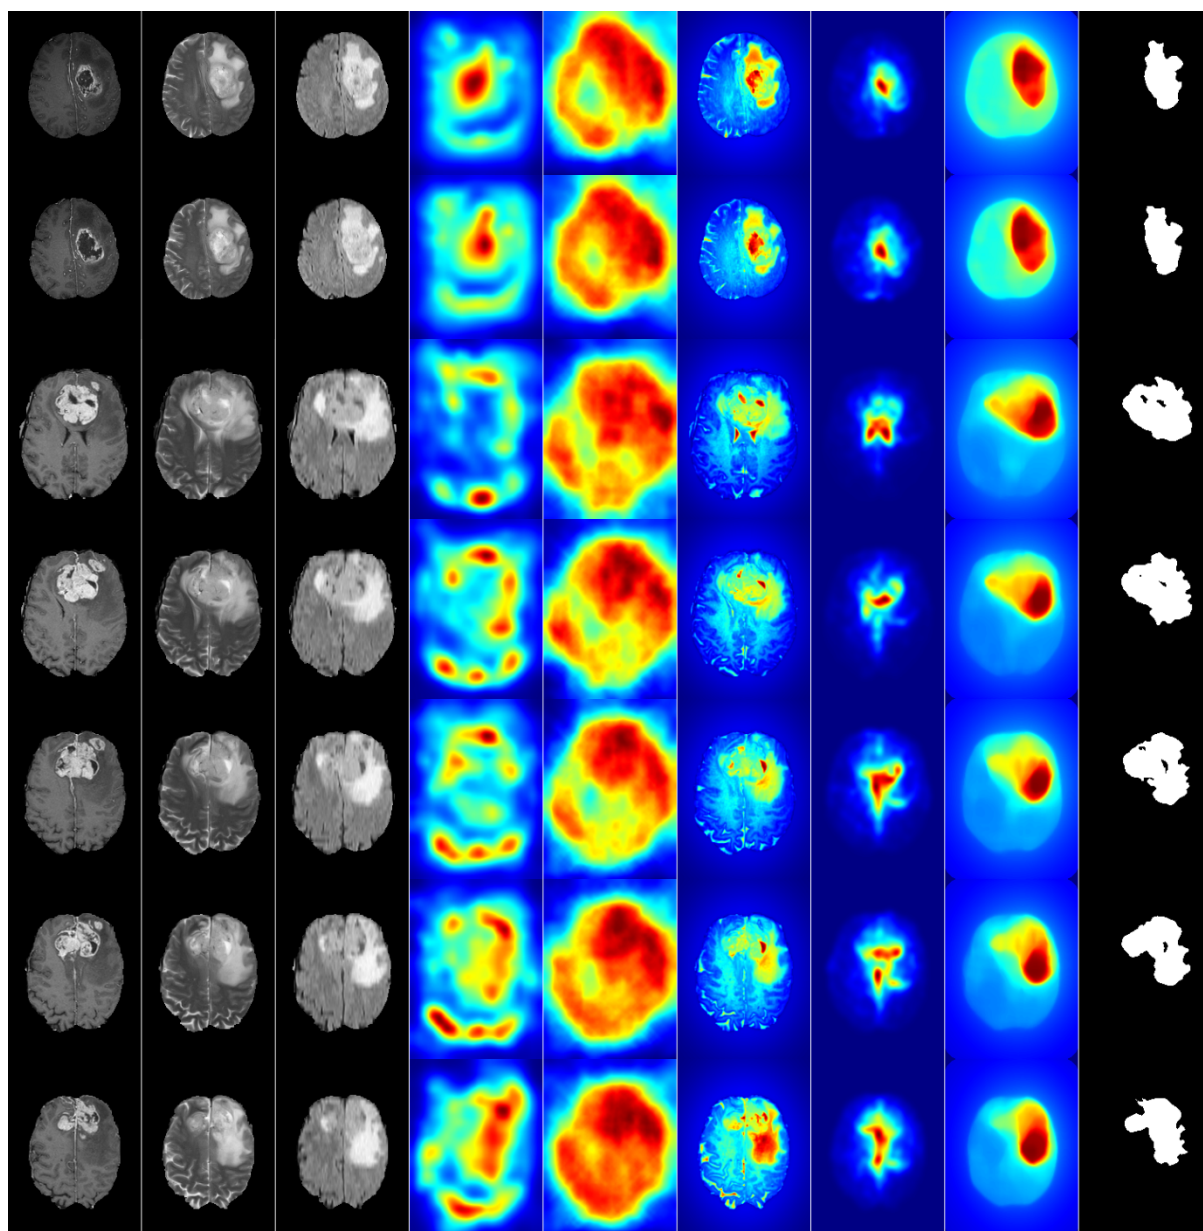

Saliency maps for 2D MR slices with LG GBM

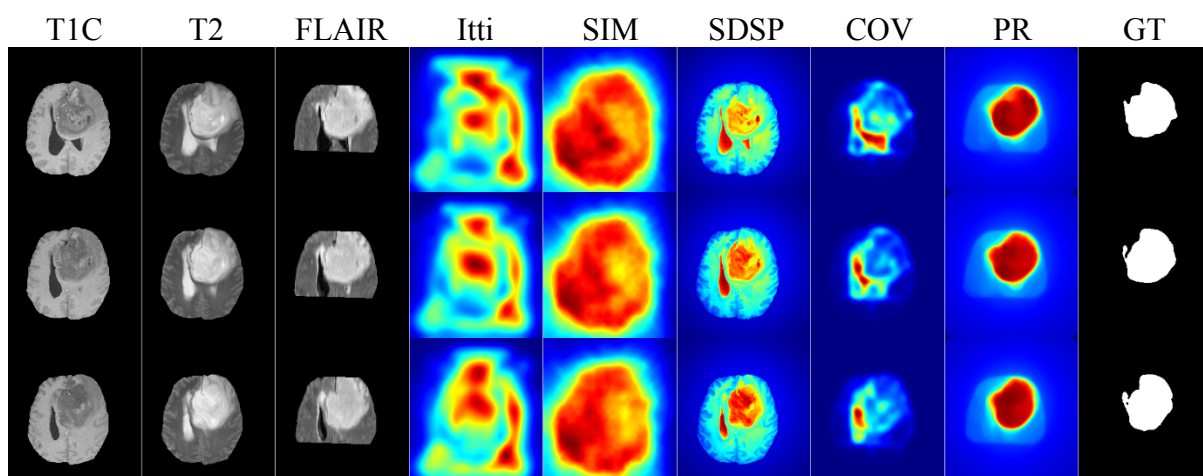



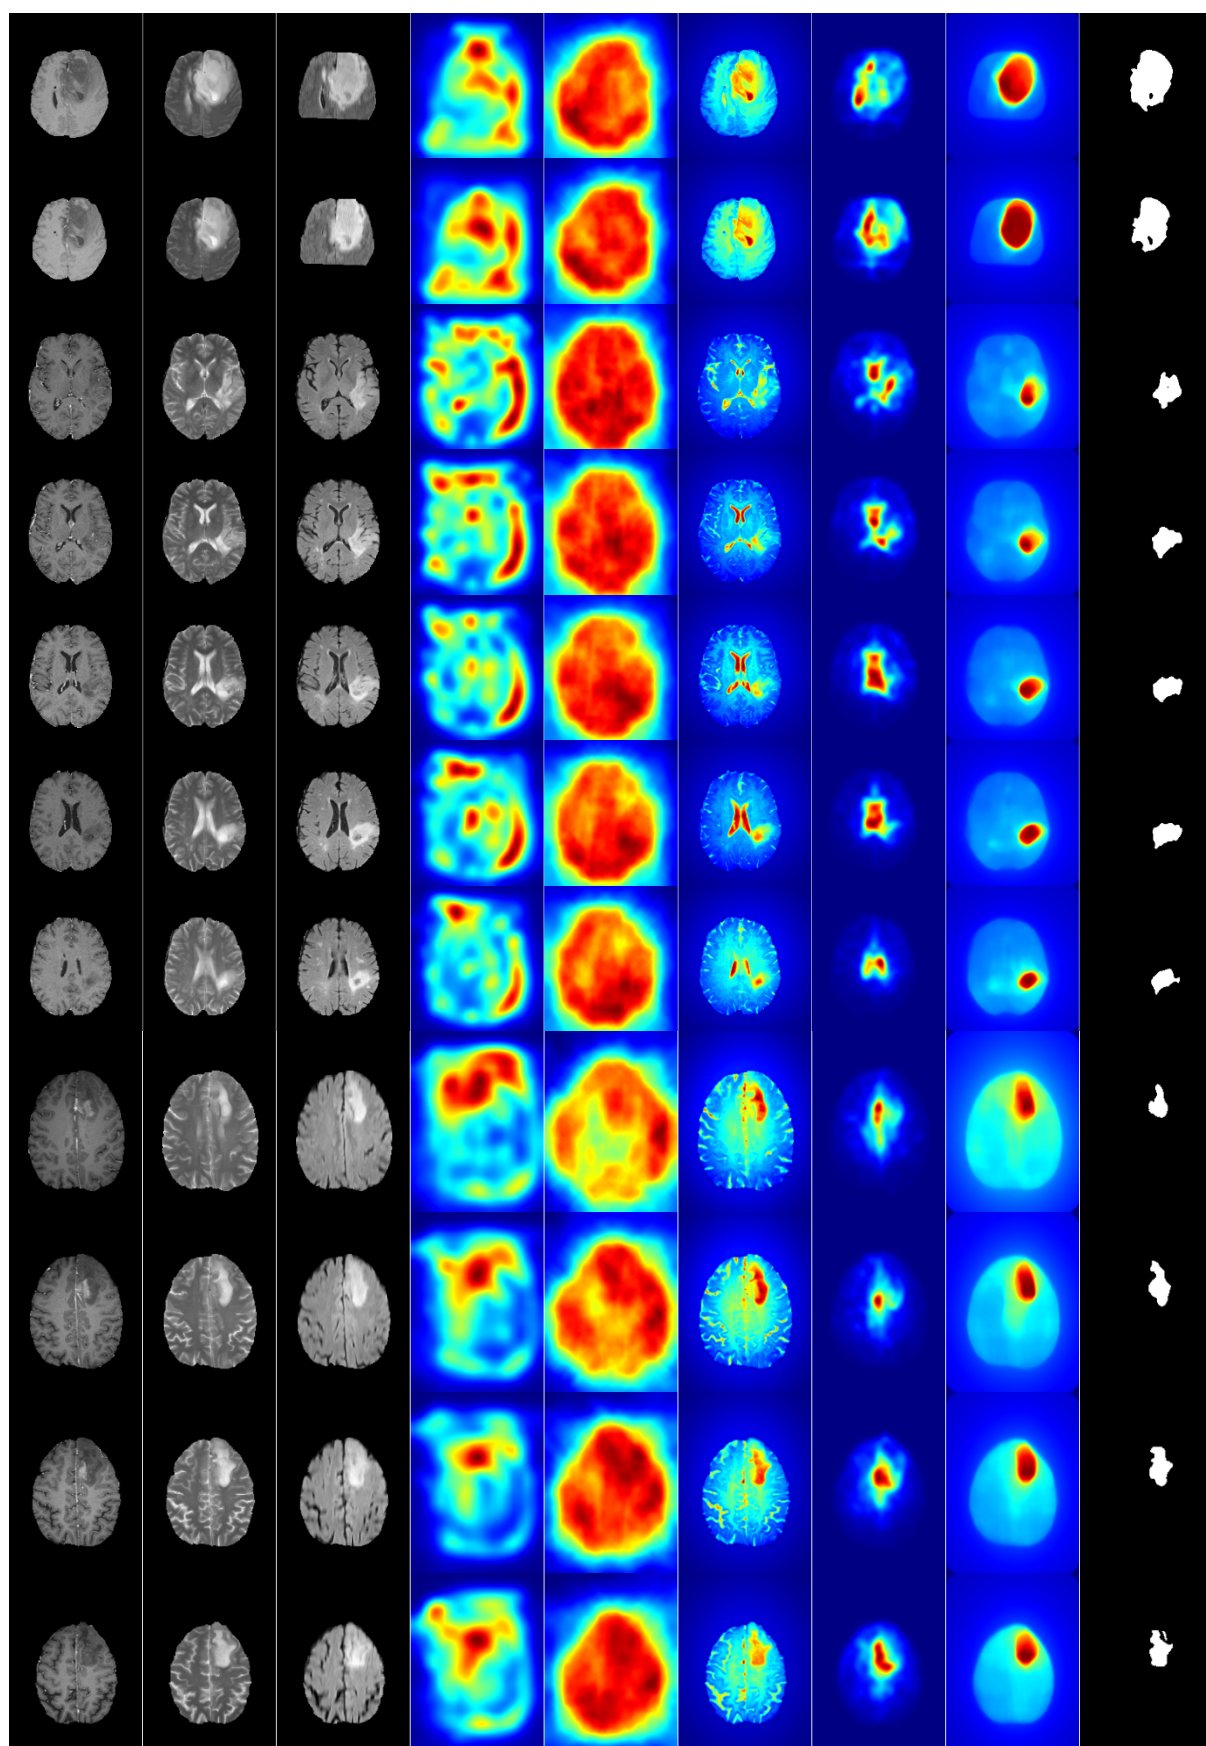

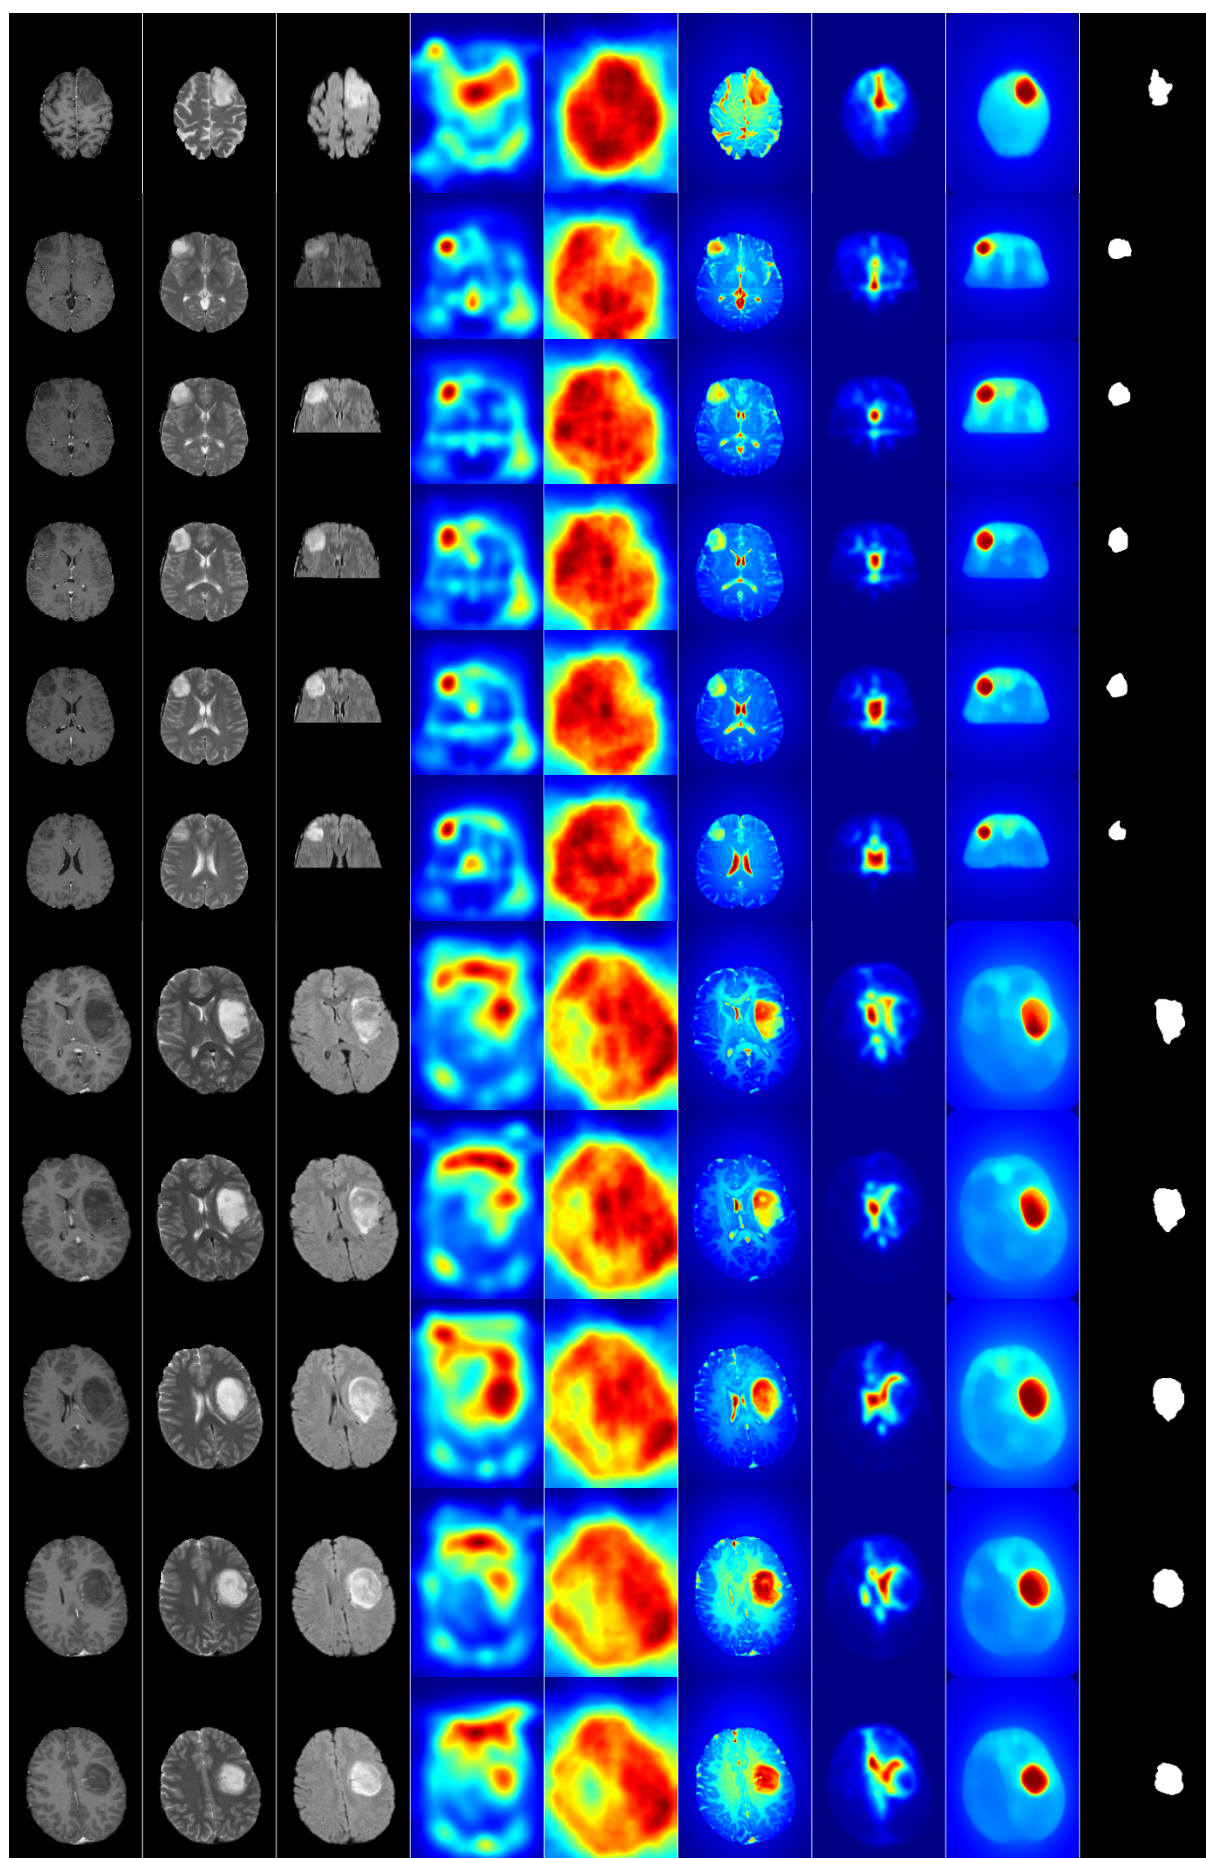



Saliency maps for 2D MR slices with SimHG GBM

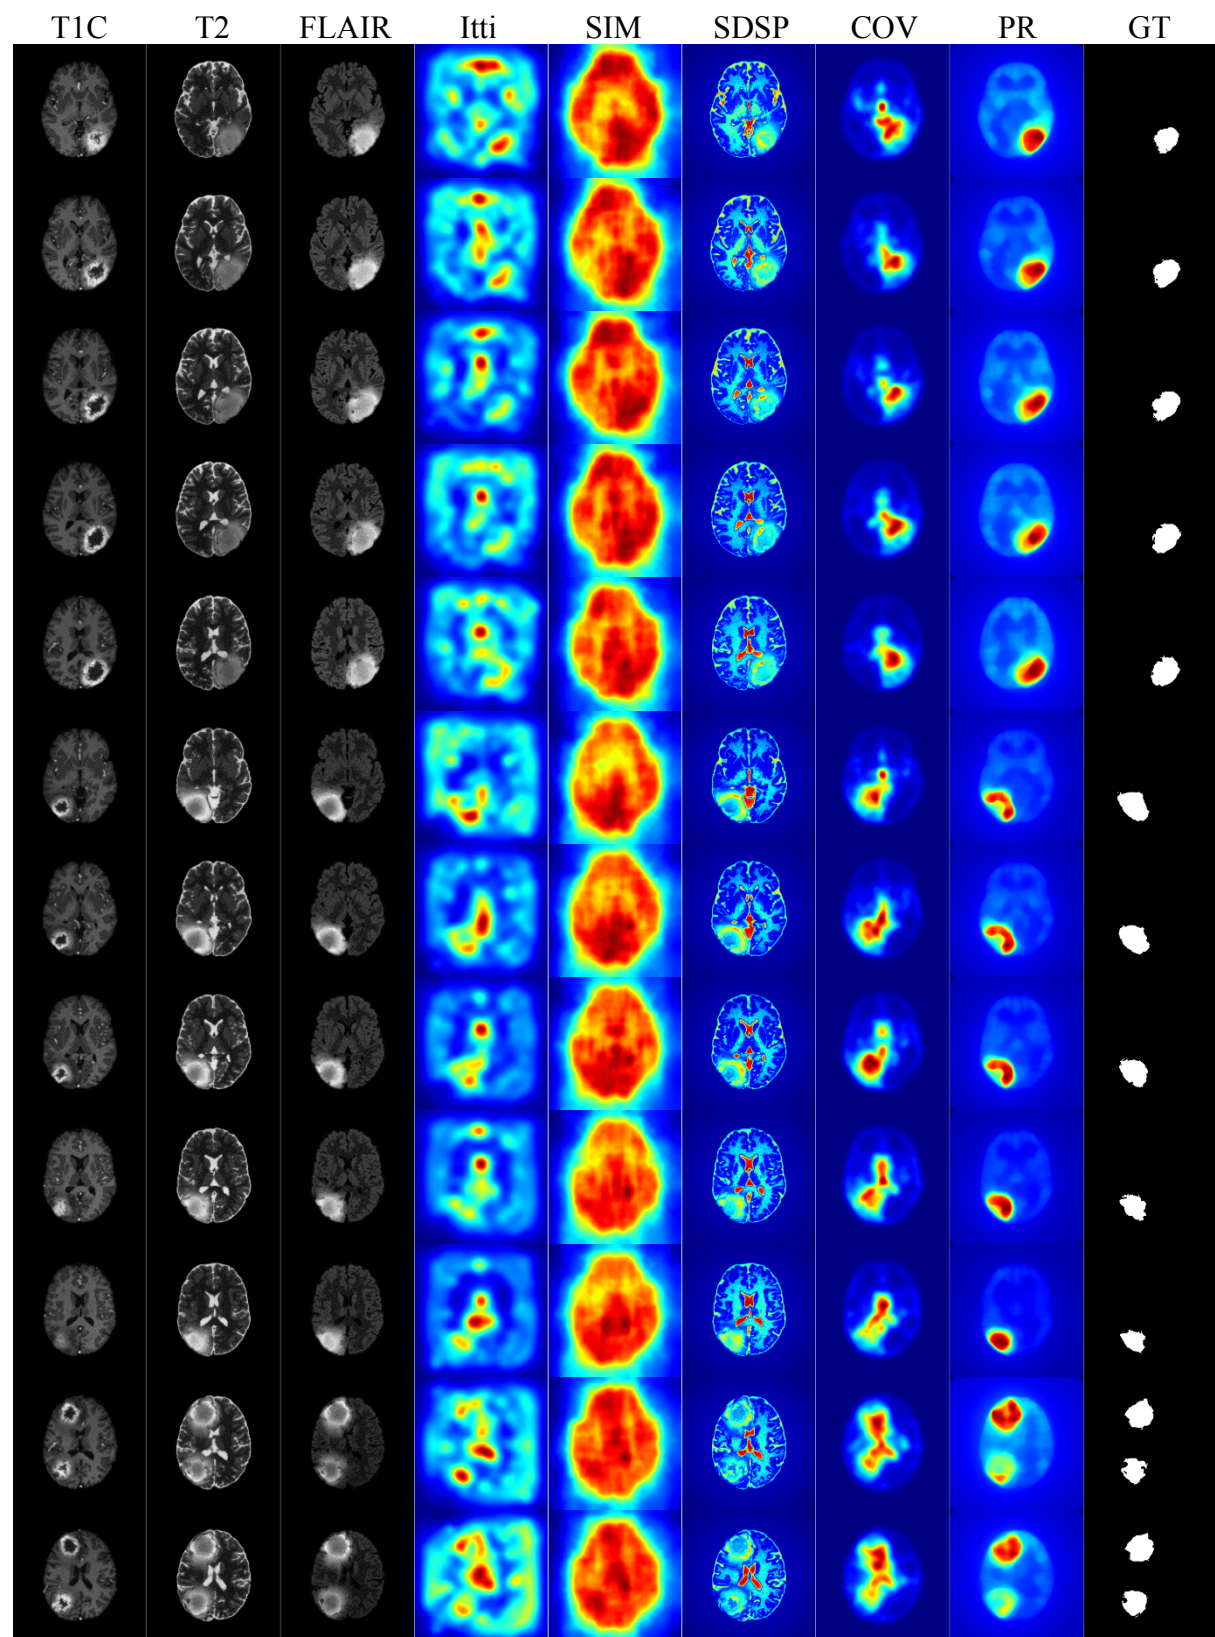

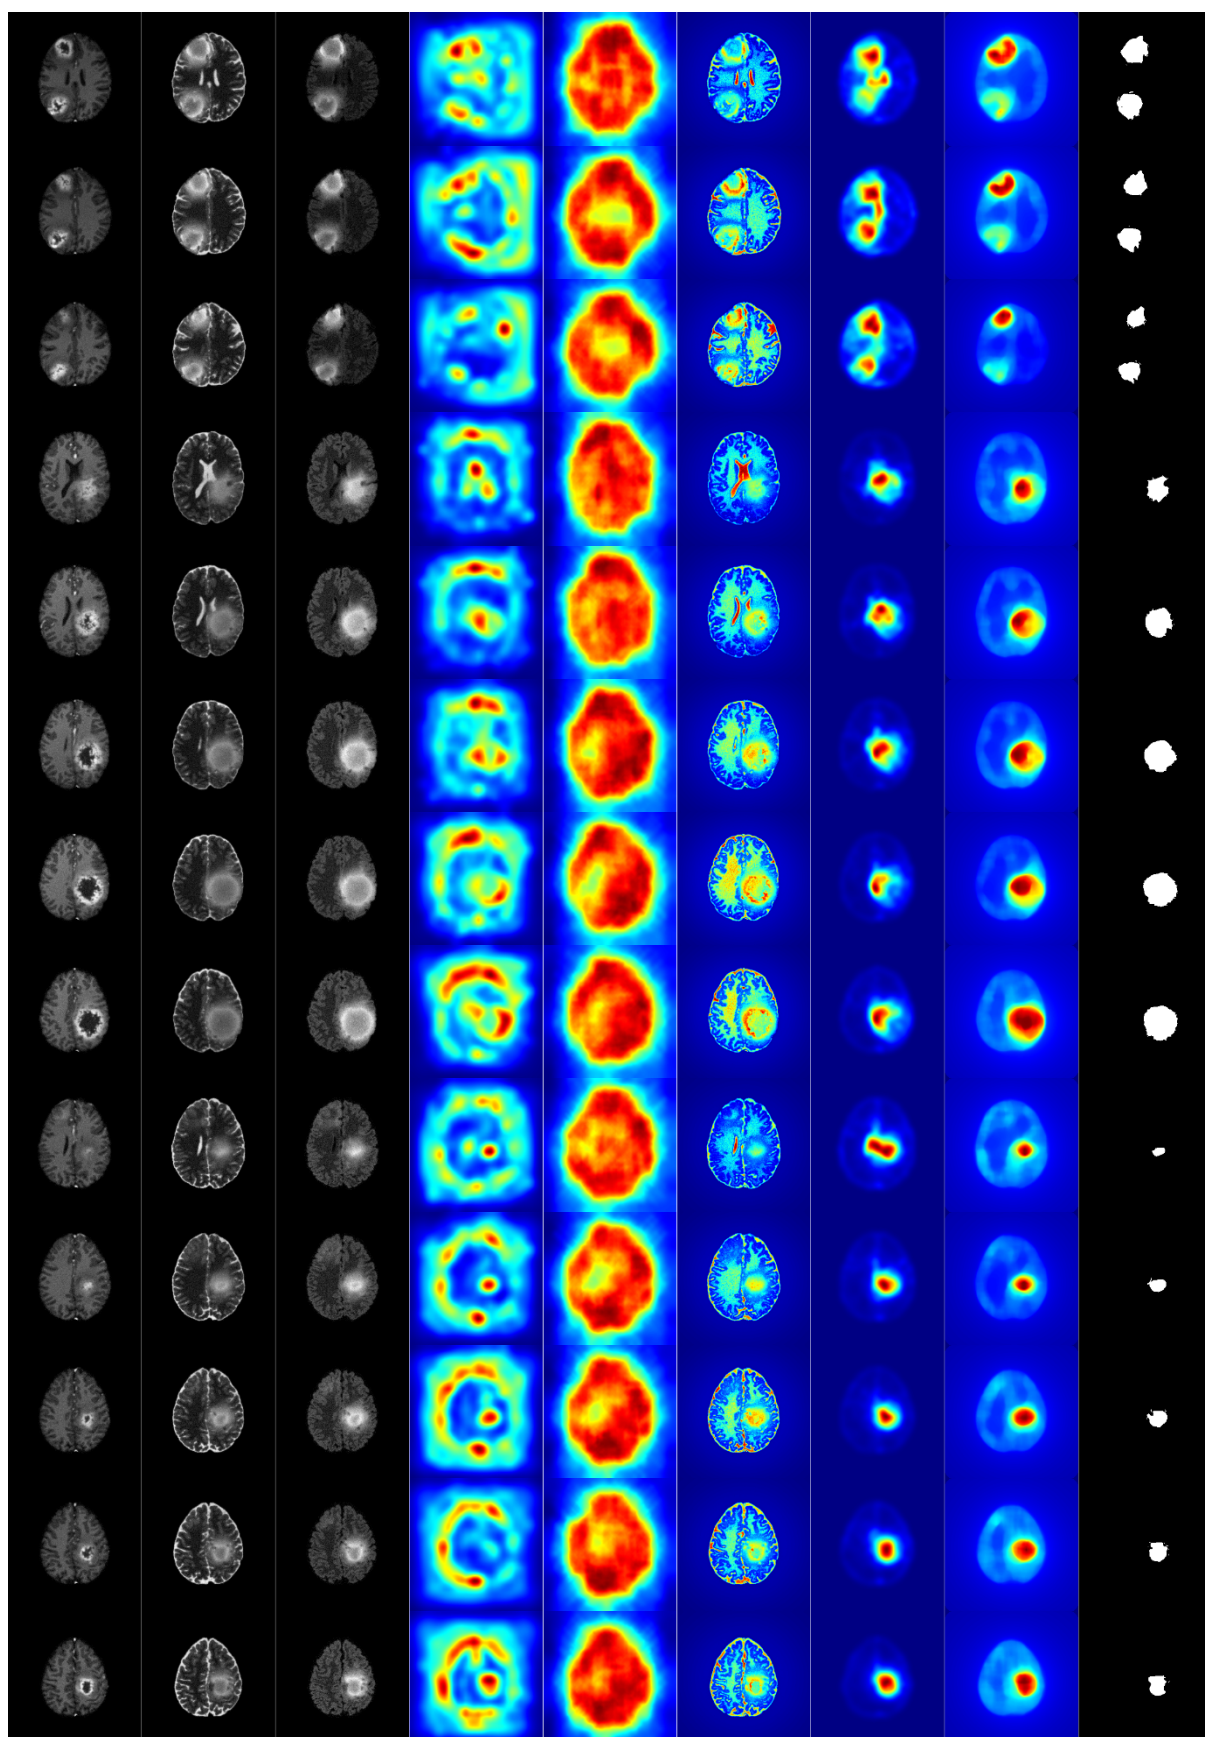



Saliency maps for 2D MR slices with SimLG GBM

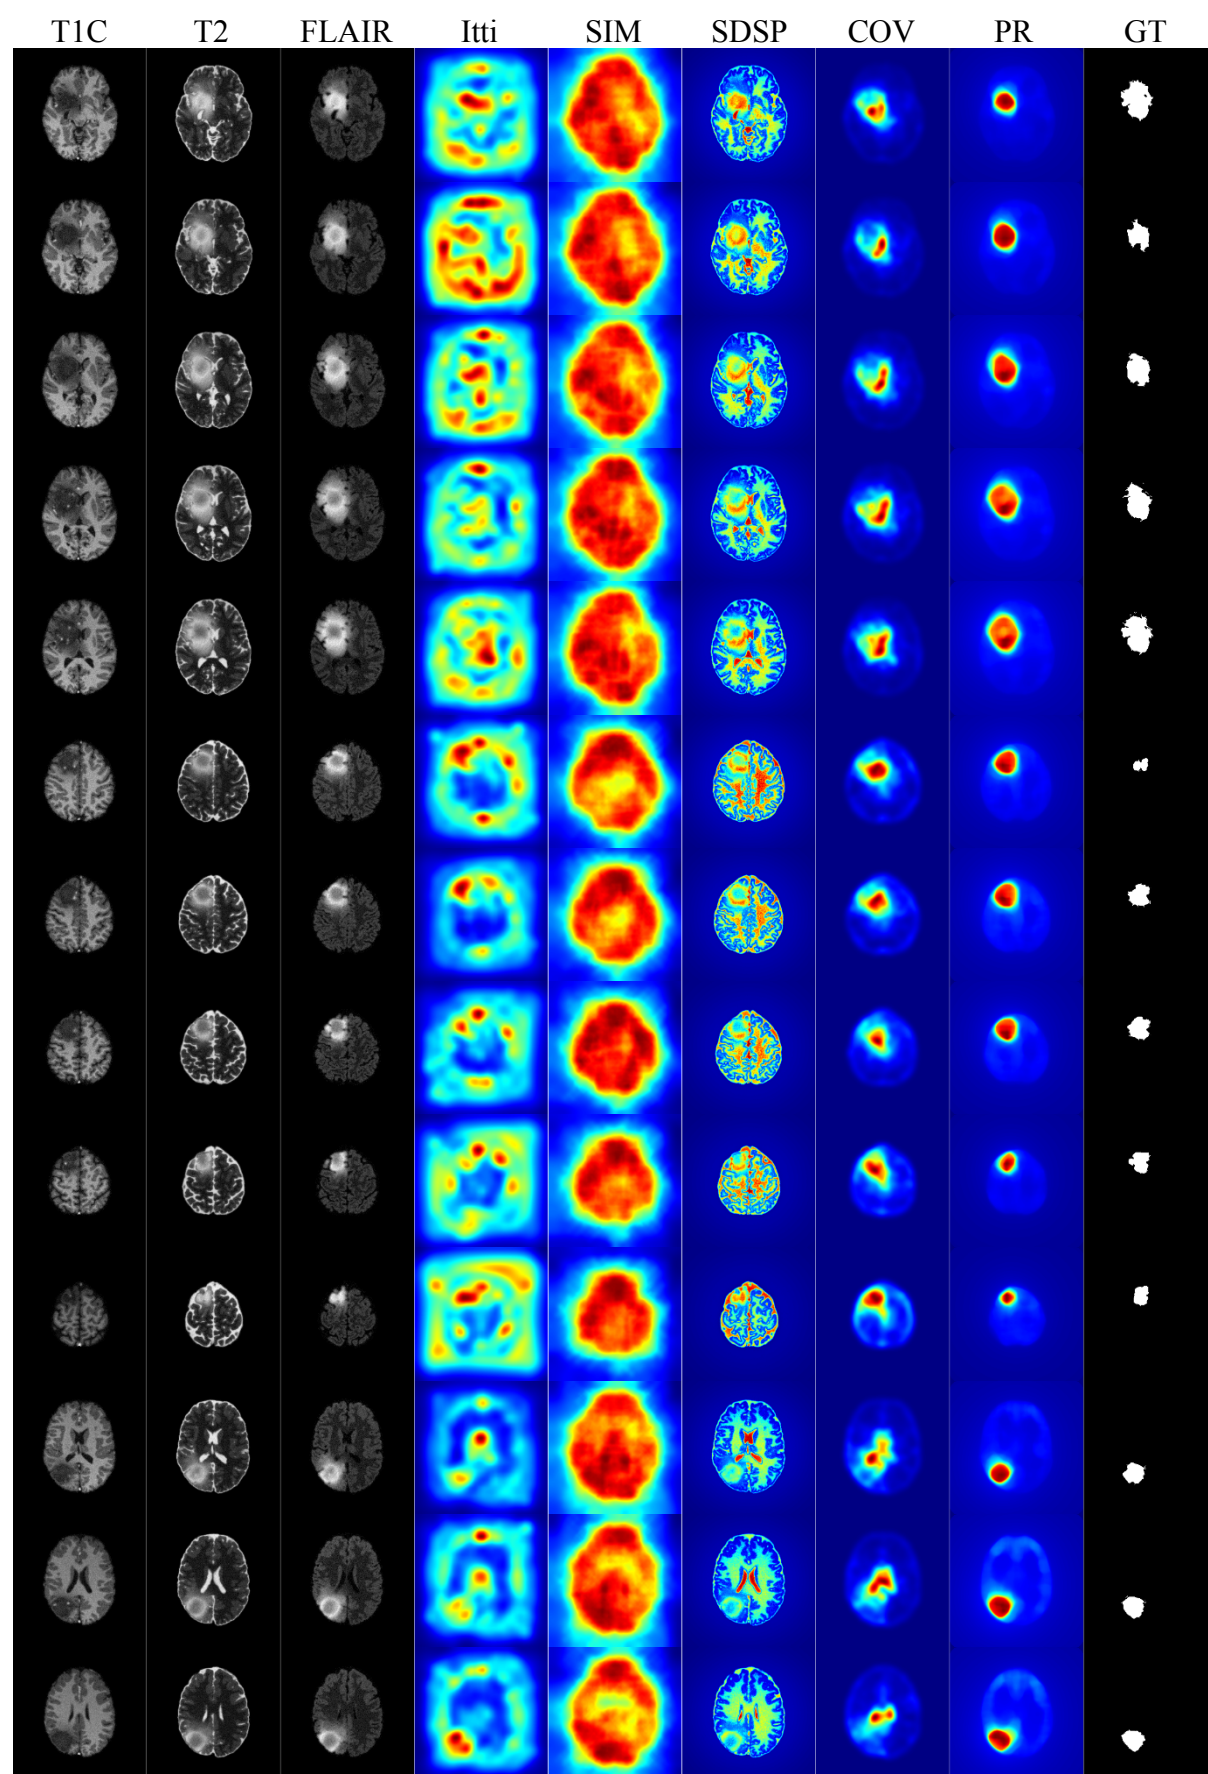

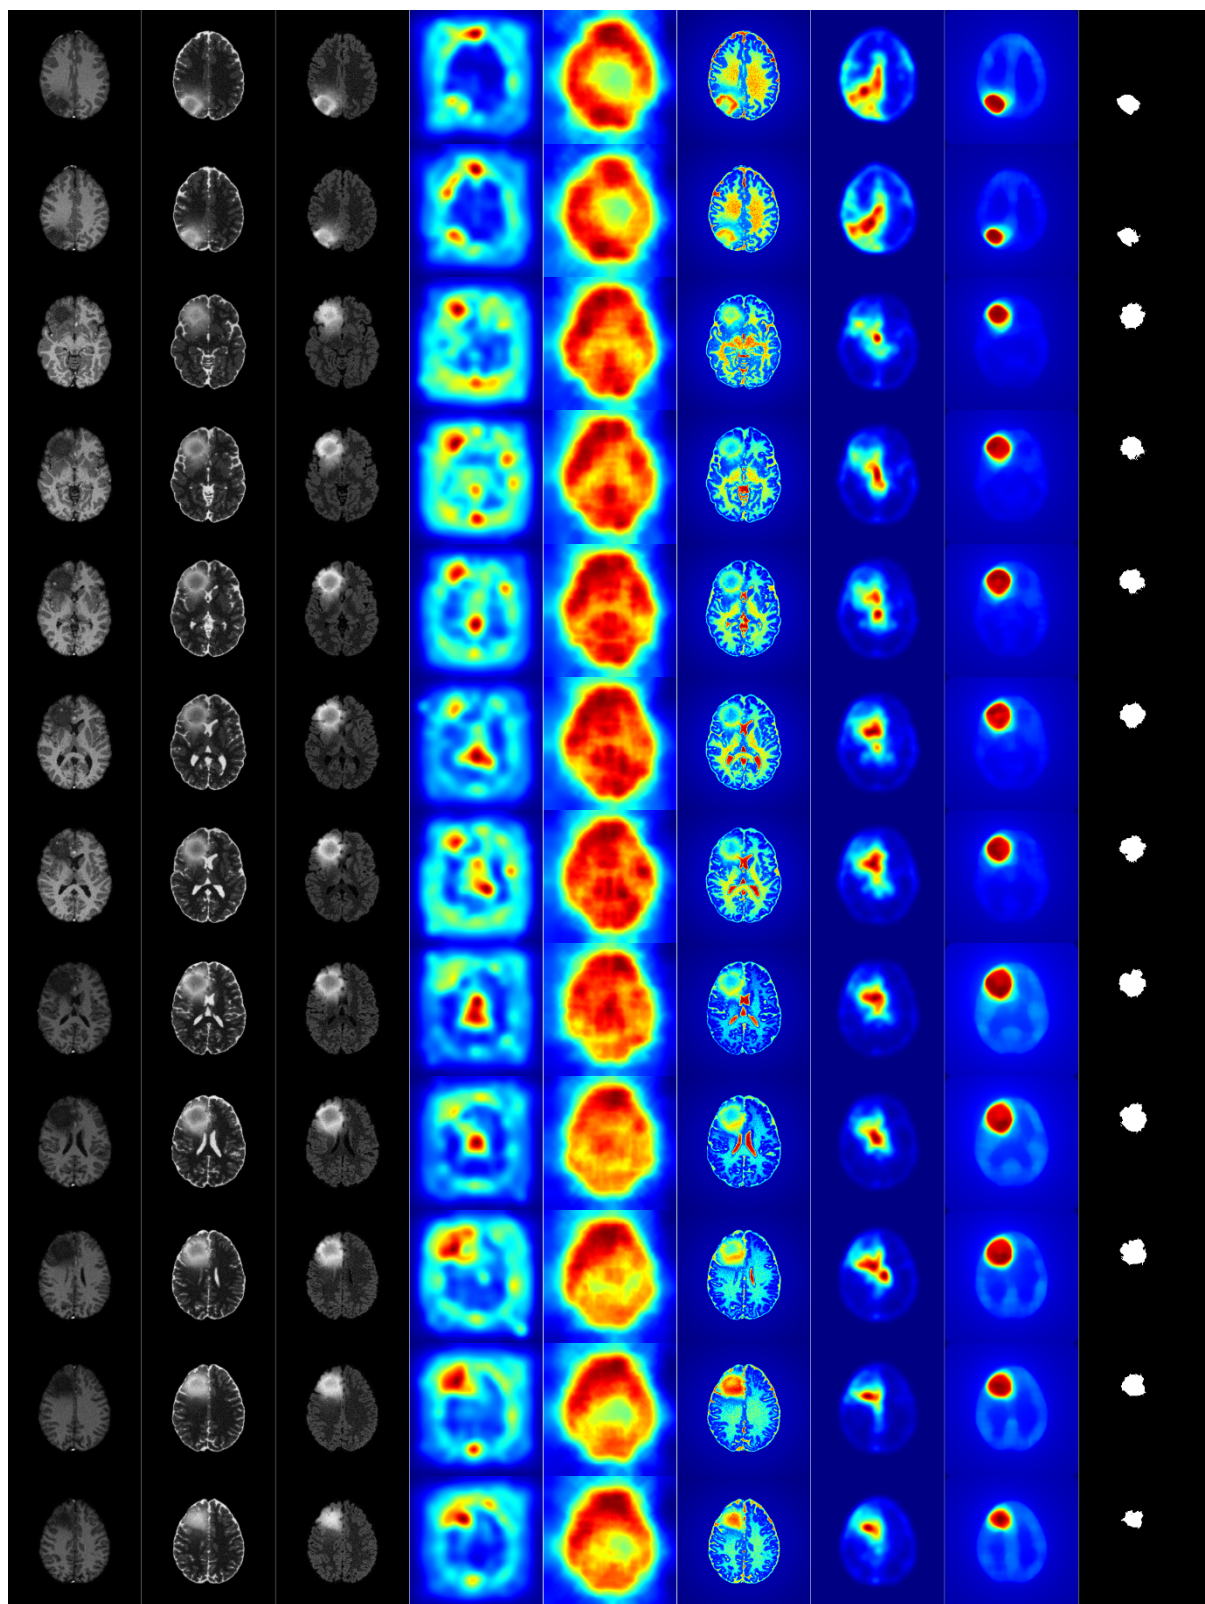

Supplement: S1 (10.1371/journal.pone.0146388.s001) [file journal.pone.0146388.s001]
